# Supplementary material
Source: Springer Nature journal article supplement (https://www.springermedizin.de/resource/supplementary/12916_2010_352_MOESM3_ESM.pdf/9599824)
Supplement: MOESM3 [file 9599824]

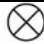

**Clopidogrel Responder**

**Low-Responder**

High Clopidogrel Dose

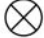

Prasugrel 10 mg/d

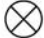

High Prasugrel Dose

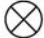

Definite Low-Responder

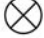

MeSAMP Test  
(=ADP P2Y12 Receptor Antagonist)
